# Supplementary material for: A thinner-than-present West Antarctic Ice Sheet in the southern Weddell Sea Embayment during the Holocene
Source: Copernicus journal article supplement (doi:10.5194/egusphere-2025-4794), 2025-10-08
Supplement: Supplementary file 1 [file Blanks.xlsx]

## Sheet: Sheet1
ID	N14	D_N14
12602	45243	1854
13403	52545	7206.22
12604	48097.4	4122.56
12605	68114.8	3499.46
12606	66988.4	2551.77
12607	90979.2	8433.36
12608	58785.1	5329.76
12609	63879.7	3499.87
12610	52493.8	3510.88
longterm_blank	15500	9500
