# Supplementary material for: A thinner-than-present West Antarctic Ice Sheet in the southern Weddell Sea Embayment during the Holocene
Source: Copernicus journal article supplement (doi:10.5194/egusphere-2025-4794), 2025-10-08
Supplement: Supplementary file 4 [file EH_14_data_v2.xlsx]

## Sheet: Sheet1
Borehole	Sample_ID	Lat	Long	ice_surf_ele	ice_thick	rock_surf_ele	core_depth_top	core_depth_bottom	N14	d_N14
2	BH02_0-5	-79.944	-81.4288	507	24	483	0	0.05	16983.1	5494.47
2	BH02_5-10	-79.944	-81.4288	507	24	483	0.05	0.1	9878.46	3084.13
2	BH02_25-30	-79.944	-81.4288	507	24	483	0.25	0.3	7020.3	2219.87
2	BH02_35-45	-79.944	-81.4288	507	24	483	0.35	0.45	10928.3	2092.51
3	BH03 _Core_top	-79.9439	-81.4322	510	30	480	0	0.01	21015.7	3979.76
3	BH03_0-5	-79.9439	-81.4322	510	30	480	0.01	0.05	17514.9	2938.62
3	BH03_5-10	-79.9439	-81.4322	510	30	480	0.05	0.1	8861.29	2220.57
3	BH03_15-20	-79.9439	-81.4322	510	30	480	0.15	0.2	12654.2	2635.14
6	BH06 _Core_top	-79.9439	-81.4294	509	10	499	0.01	0.05	10261.4	2795.58
